# Supplementary material for: Relationships of Community and Individual Level Social Capital with Activities of Daily Living and Death by Gender
Source: MDPI journal article supplement (doi:10.3390/ijerph13090860), 2016-08-29

# Supplementary Materials: Relationships of Community and Individual Level Social Capital with Activities of Daily Living and Death by Gender

Haruhiko Imamura, Tsuyoshi Hamano, Takehiro Michikawa, Fujimi Takeda-Imai, Takahiro Nakamura, Toru Takebayashi and Yuji Nishiwaki

**Table S1.** (Sensitivity analyses 1). Association of community and individual level social capital with decline in ADL (excluding deaths): results from multilevel logistic regression models.

| Social Capital              | Model 1 *        |         | Model 2 †        |         | Model 3 ‡        |         |
|-----------------------------|------------------|---------|------------------|---------|------------------|---------|
|                             | OR (95% CI)      | p-Value | OR (95% CI)      | p-Value | OR (95% CI)      | p-Value |
| <b>(Total (n = 952))</b>    |                  |         |                  |         |                  |         |
| <b>Social participation</b> |                  |         |                  |         |                  |         |
| <b>Community level §</b>    |                  |         |                  |         |                  |         |
| High                        | 1.00             |         | 1.00             |         | 1.00             |         |
| Low                         | 1.41 (0.97–2.05) | 0.07    | 1.34 (0.92–1.96) | 0.12    | 1.35 (0.92–1.97) | 0.13    |
| <b>Individual level</b>     |                  |         |                  |         |                  |         |
| Participate                 |                  |         | 1.00             |         | 1.00             |         |
| Not participate             |                  |         | 2.08 (1.43–3.03) | <0.001  | 1.96 (1.34–2.88) | 0.001   |
| <b>Generalized trust</b>    |                  |         |                  |         |                  |         |
| <b>Community level ¶</b>    |                  |         |                  |         |                  |         |
| High                        | 1.00             |         | 1.00             |         | 1.00             |         |
| Low                         | 0.69 (0.48–0.99) | 0.05    | 0.65 (0.45–0.95) | 0.03    | 0.66 (0.45–0.96) | 0.03    |
| <b>Individual level</b>     |                  |         |                  |         |                  |         |
| Tend to trust               |                  |         | 1.00             |         | 1.00             |         |
| Tend to be careful          |                  |         | 1.38 (0.94–2.01) | 0.10    | 1.36 (0.93–1.99) | 0.12    |
| <b>(Men (n = 441))</b>      |                  |         |                  |         |                  |         |
| <b>Social participation</b> |                  |         |                  |         |                  |         |
| <b>Community level</b>      |                  |         |                  |         |                  |         |
| High                        | 1.00             |         | 1.00             |         | 1.00             |         |
| Low                         | 1.72 (0.97–3.05) | 0.06    | 1.64 (0.91–2.97) | 0.10    | 1.60 (0.89–2.89) | 0.12    |
| <b>Individual level</b>     |                  |         |                  |         |                  |         |
| Participate                 |                  |         | 1.00             |         | 1.00             |         |
| Not participate             |                  |         | 2.42 (1.36–4.32) | 0.003   | 2.32 (1.32–4.09) | 0.003   |
| <b>Generalized trust</b>    |                  |         |                  |         |                  |         |
| <b>Community level</b>      |                  |         |                  |         |                  |         |
| High                        | 1.00             |         | 1.00             |         | 1.00             |         |
| Low                         | 0.73 (0.42–1.27) | 0.27    | 0.64 (0.36–1.16) | 0.15    | 0.66 (0.37–1.19) | 0.17    |
| <b>Individual level</b>     |                  |         |                  |         |                  |         |
| Tend to trust               |                  |         | 1.00             |         | 1.00             |         |
| Tend to be careful          |                  |         | 2.34 (1.28–4.30) | 0.006   | 2.27 (1.23–4.21) | 0.009   |
| <b>(Women (n = 511))</b>    |                  |         |                  |         |                  |         |
| <b>Social participation</b> |                  |         |                  |         |                  |         |
| <b>Community level</b>      |                  |         |                  |         |                  |         |
| High                        | 1.00             |         | 1.00             |         | 1.00             |         |
| Low                         | 1.23 (0.75–2.02) | 0.41    | 1.15 (0.70–1.91) | 0.57    | 1.18 (0.71–1.97) | 0.52    |
| <b>Individual level</b>     |                  |         |                  |         |                  |         |
| Participate                 |                  |         | 1.00             |         | 1.00             |         |
| Not participate             |                  |         | 1.88 (1.13–3.12) | 0.02    | 1.75 (1.04–2.95) | 0.04    |
| <b>Generalized trust</b>    |                  |         |                  |         |                  |         |
| <b>Community level</b>      |                  |         |                  |         |                  |         |
| High                        | 1.00             |         | 1.00             |         | 1.00             |         |
| Low                         | 0.66 (0.40–1.08) | 0.10    | 0.64 (0.39–1.05) | 0.08    | 0.63 (0.38–1.04) | 0.07    |
| <b>Individual level</b>     |                  |         |                  |         |                  |         |
| Tend to trust               |                  |         | 1.00             |         | 1.00             |         |
| Tend to be careful          |                  |         | 0.95 (0.57–1.56) | 0.83    | 0.96 (0.58–1.59) | 0.86    |

Notes: OR = odds ratio; CI = confidence interval; \* Model 1. Community level social capital adjusted for age (continuous), and sex; † Model 2. Community level and individual level social capital adjusted for age (continuous), and sex; ‡ Model 3. Community level and individual level social capital adjusted for age (continuous), sex, marital status, educational attainment, number of people living together, and self-rated health; § Top four areas (high) and lower four areas (low) for social participation at community level; ¶ Top four areas (high) and lower four areas (low) for generalized trust at community level.

**Table S2.** (Sensitivity analyses 2). Association of community and individual level social capital with composite outcome excluding those who had outcome in the first year of the follow-up period: results from multilevel logistic regression models.

| Social Capital              | Model 1 *        |         | Model 2 †        |         | Model 3 ‡        |         |
|-----------------------------|------------------|---------|------------------|---------|------------------|---------|
|                             | OR (95% CI)      | p-Value | OR (95% CI)      | p-Value | OR (95% CI)      | p-Value |
| <b>(Total (n = 902))</b>    |                  |         |                  |         |                  |         |
| <b>Social participation</b> |                  |         |                  |         |                  |         |
| <b>Community level §</b>    |                  |         |                  |         |                  |         |
| High                        | 1.00             |         | 1.00             |         | 1.00             |         |
| Low                         | 1.18 (0.78–1.78) | 0.43    | 1.13 (0.75–1.71) | 0.55    | 1.13 (0.75–1.72) | 0.56    |
| <b>Individual level</b>     |                  |         |                  |         |                  |         |
| Participate                 |                  |         | 1.00             |         | 1.00             |         |
| Not participate             |                  |         | 1.55 (1.02–2.35) | 0.04    | 1.55 (1.02–2.35) | 0.04    |
| <b>Generalized trust</b>    |                  |         |                  |         |                  |         |
| <b>Community level ¶</b>    |                  |         |                  |         |                  |         |
| High                        | 1.00             |         | 1.00             |         | 1.00             |         |
| Low                         | 0.57 (0.38–0.85) | 0.006   | 0.54 (0.36–0.82) | 0.004   | 0.54 (0.36–0.83) | 0.004   |
| <b>Individual level</b>     |                  |         |                  |         |                  |         |
| Tend to trust               |                  |         | 1.00             |         | 1.00             |         |
| Tend to be careful          |                  |         | 1.38 (0.91–2.10) | 0.13    | 1.38 (0.91–2.12) | 0.13    |
| <b>(Men (n = 423))</b>      |                  |         |                  |         |                  |         |
| <b>Social participation</b> |                  |         |                  |         |                  |         |
| <b>Community level</b>      |                  |         |                  |         |                  |         |
| High                        | 1.00             |         | 1.00             |         | 1.00             |         |
| Low                         | 1.22 (0.66–2.25) | 0.54    | 1.18 (0.63–2.21) | 0.61    | 1.22 (0.65–2.29) | 0.55    |
| <b>Individual level</b>     |                  |         |                  |         |                  |         |
| Participate                 |                  |         | 1.00             |         | 1.00             |         |
| Not participate             |                  |         | 1.86 (0.99–3.48) | 0.05    | 1.83 (0.98–3.44) | 0.06    |
| <b>Generalized trust</b>    |                  |         |                  |         |                  |         |
| <b>Community level</b>      |                  |         |                  |         |                  |         |
| High                        | 1.00             |         | 1.00             |         | 1.00             |         |
| Low                         | 0.50 (0.27–0.94) | 0.03    | 0.44 (0.23–0.84) | 0.01    | 0.42 (0.21–0.81) | 0.01    |
| <b>Individual level</b>     |                  |         |                  |         |                  |         |
| Tend to trust               |                  |         | 1.00             |         | 1.00             |         |
| Tend to be careful          |                  |         | 2.82 (1.41–5.63) | 0.003   | 3.00 (1.48–6.08) | 0.002   |
| <b>(Women (n = 479))</b>    |                  |         |                  |         |                  |         |
| <b>Social participation</b> |                  |         |                  |         |                  |         |
| <b>Community level</b>      |                  |         |                  |         |                  |         |
| High                        | 1.00             |         | 1.00             |         | 1.00             |         |
| Low                         | 1.15 (0.66–1.99) | 0.62    | 1.09 (0.62–1.90) | 0.77    | 1.07 (0.61–1.88) | 0.82    |
| <b>Individual level</b>     |                  |         |                  |         |                  |         |
| Participate                 |                  |         | 1.00             |         | 1.00             |         |
| Not participate             |                  |         | 1.38 (0.79–2.41) | 0.26    | 1.38 (0.78–2.43) | 0.27    |
| <b>Generalized trust</b>    |                  |         |                  |         |                  |         |
| <b>Community level</b>      |                  |         |                  |         |                  |         |
| High                        | 1.00             |         | 1.00             |         | 1.00             |         |
| Low                         | 0.62 (0.36–1.06) | 0.08    | 0.62 (0.36–1.07) | 0.08    | 0.61 (0.35–1.06) | 0.08    |
| <b>Individual level</b>     |                  |         |                  |         |                  |         |
| Tend to trust               |                  |         | 1.00             |         | 1.00             |         |
| Tend to be careful          |                  |         | 0.85 (0.49–1.48) | 0.57    | 0.85 (0.49–1.49) | 0.58    |

Notes: OR = odds ratio; CI = confidence interval; \* Model 1. Community level social capital adjusted for age (continuous), and sex; † Model 2. Community level and individual level social capital adjusted for age (continuous), and sex; ‡ Model 3. Community level and individual level social capital adjusted for age (continuous), sex, marital status, educational attainment, number of people living together, and self-rated health; § Top four areas (high) and lower four areas (low) for social participation at community level; ¶ Top four areas (high) and lower four areas (low) for generalized trust at community level.

**Table S3.** (Sensitivity analyses 3). Association of community and individual level social capital with composite outcome considering a history of major diseases: results from multilevel logistic regression models.

| Social Capital              | Model 1 *        |         | Model 2 †        |         | Model 3 ‡        |         |
|-----------------------------|------------------|---------|------------------|---------|------------------|---------|
|                             | OR (95% CI)      | p-Value | OR (95% CI)      | p-Value | OR (95% CI)      | p-Value |
| <b>(Total (n = 439))</b>    |                  |         |                  |         |                  |         |
| <b>Social participation</b> |                  |         |                  |         |                  |         |
| <b>Community level §</b>    |                  |         |                  |         |                  |         |
| High                        | 1.00             |         | 1.00             |         | 1.00             |         |
| Low                         | 1.04 (0.56–1.92) | 0.91    | 1.03 (0.58–1.85) | 0.92    | 1.05 (0.58–1.89) | 0.88    |
| <b>Individual level</b>     |                  |         |                  |         |                  |         |
| Participate                 |                  |         | 1.00             |         | 1.00             |         |
| Not participate             |                  |         | 2.12 (1.23–3.66) | 0.007   | 2.11 (1.21–3.69) | 0.009   |
| <b>Generalized trust</b>    |                  |         |                  |         |                  |         |
| <b>Community level ¶</b>    |                  |         |                  |         |                  |         |
| High                        | 1.00             |         | 1.00             |         | 1.00             |         |
| Low                         | 0.74 (0.40–1.37) | 0.34    | 0.65 (0.36–1.17) | 0.15    | 0.69 (0.38–1.23) | 0.21    |
| <b>Individual level</b>     |                  |         |                  |         |                  |         |
| Tend to trust               |                  |         | 1.00             |         | 1.00             |         |
| Tend to be careful          |                  |         | 1.23 (0.72–2.08) | 0.45    | 1.15 (0.67–1.98) | 0.62    |
| <b>(Men (n = 198))</b>      |                  |         |                  |         |                  |         |
| <b>Social participation</b> |                  |         |                  |         |                  |         |
| <b>Community level</b>      |                  |         |                  |         |                  |         |
| High                        | 1.00             |         | 1.00             |         | 1.00             |         |
| Low                         | 1.02 (0.42–2.43) | 0.97    | 0.96 (0.37–2.53) | 0.94    | 1.12 (0.43–2.92) | 0.81    |
| <b>Individual level</b>     |                  |         |                  |         |                  |         |
| Participate                 |                  |         | 1.00             |         | 1.00             |         |
| Not participate             |                  |         | 2.04 (0.85–4.90) | 0.11    | 1.93 (0.78–4.79) | 0.16    |
| <b>Generalized trust</b>    |                  |         |                  |         |                  |         |
| <b>Community level</b>      |                  |         |                  |         |                  |         |
| High                        | 1.00             |         | 1.00             |         | 1.00             |         |
| Low                         | 0.56 (0.23–1.36) | 0.20    | 0.44 (0.16–1.20) | 0.11    | 0.46 (0.17–1.20) | 0.11    |
| <b>Individual level</b>     |                  |         |                  |         |                  |         |
| Tend to trust               |                  |         | 1.00             |         | 1.00             |         |
| Tend to be careful          |                  |         | 3.29 (1.31–8.22) | 0.01    | 3.67 (1.39–9.67) | 0.009   |
| <b>(Women (n = 241))</b>    |                  |         |                  |         |                  |         |
| <b>Social participation</b> |                  |         |                  |         |                  |         |
| <b>Community level</b>      |                  |         |                  |         |                  |         |
| High                        | 1.00             |         | 1.00             |         | 1.00             |         |
| Low                         | 1.17 (0.58–2.36) | 0.66    | 1.11 (0.54–2.26) | 0.78    | 1.05 (0.51–2.17) | 0.90    |
| <b>Individual level</b>     |                  |         |                  |         |                  |         |
| Participate                 |                  |         | 1.00             |         | 1.00             |         |
| Not participate             |                  |         | 2.09 (1.04–4.23) | 0.04    | 2.15 (1.03–4.48) | 0.04    |
| <b>Generalized trust</b>    |                  |         |                  |         |                  |         |
| <b>Community level</b>      |                  |         |                  |         |                  |         |
| High                        | 1.00             |         | 1.00             |         | 1.00             |         |
| Low                         | 0.92 (0.46–1.85) | 0.81    | 0.86 (0.42–1.77) | 0.69    | 0.89 (0.43–1.85) | 0.76    |
| <b>Individual level</b>     |                  |         |                  |         |                  |         |
| Tend to trust               |                  |         | 1.00             |         | 1.00             |         |
| Tend to be careful          |                  |         | 0.68 (0.34–1.37) | 0.28    | 0.62 (0.30–1.27) | 0.19    |

Notes: OR = odds ratio; CI = confidence interval; \* Model 1. Community level social capital adjusted for age (continuous), and sex; † Model 2. Community level and individual level social capital adjusted for age (continuous), and sex; ‡ Model 3. Community level and individual level social capital adjusted for age (continuous), sex, marital status, educational attainment, number of people living together, self-rated health, and medical history of major diseases (stroke, myocardial infarction/angina, diabetes, Parkinson's disease, or cancer); § Top four areas (high) and lower four areas (low) for social participation at community level; ¶ Top four areas (high) and lower four areas (low) for generalized trust at community level.

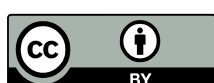

Supplement: s1 [file s1]
